# Supplementary material
Source: HighWire-hosted journal article supplement (https://bmjophth.bmj.com/content/4/1/e000360)
Supplement: inline-supplementary-material-1 [file inline-supplementary-material-1.pdf]

October 2019

**Supplementary Information****Country-specific survey results*****Australia***

Across all four domains, there were no significant differences between Australia and the other countries. In addition, no significant differences between Australia and the other countries were found for the attributes included in the 'Treatment satisfaction' and 'Symptom bother' domains. Within the 'Treatment administration' domain, there was a significant difference between Australia and the other countries for 'source of medication (prescription or non-prescription)' ( $p=0.003$ ) but not for any other attribute. There was also a significant difference between Australia and other countries in the attribute of 'treatment inconvenience' ( $p=0.004$ ) within 'Impact on daily life'.

***Germany***

No significant differences between Germany and the other countries were found across the domains of 'Treatment satisfaction' and 'Impact on daily life'. However, there were significant differences between Germany and the other countries with respect to 'Symptom bother' ( $p=0.003$ ) and 'Treatment administration' ( $p=0.003$ ). Examining the attributes included in these domains, there were significant differences between Germany and the other countries for 'how quickly the treatment starts to relieve the symptoms of dry eye' ( $p<0.001$ ) and 'treatment experience' ( $p=0.010$ ). On the 'Treatment administration' domain, there were significant differences between Germany and the other countries for 'how the treatment works' ( $p=0.013$ ), 'how the medicine is applied' ( $p<0.001$ ), 'source of medication' ( $p=0.013$ ) and 'packaging of the treatment' ( $p=0.008$ ).

***United Kingdom***

There were no significant differences between the UK and the other countries with respect to the four domains. Examining the attributes included in the domains, significant differences were found between the UK and the other countries for the attribute 'how quickly the treatment starts to relieve the symptoms of dry eye' ( $p=0.0001$ ) within 'Treatment satisfaction'. On the 'Treatment administration' domain, there were significant differences between the UK and the other countries for 'how the medicine is applied' ( $p=0.032$ ) and 'source of medication' (prescription or non-prescription) ( $p=0.023$ ).

October 2019

**United States**

There were significant differences between the USA and other countries with respect to the 'Treatment satisfaction' ( $p=0.033$ ) and 'Treatment administration' ( $p=0.040$ ) domains. Within 'Treatment satisfaction', significant differences emerged between the USA and other countries for the attributes of 'treatment experience' ( $p=0.019$ ) and 'side effects of treatment' ( $p=0.004$ ). On the 'Treatment administration' domain, there was a significant difference between the USA and other countries for 'packaging of treatment' ( $p=0.003$ ). Within the 'Impact on daily life' domain, there was a significant difference in the 'impact on daily situations' attribute ( $p=0.043$ ).

October 2019

Supplementary Figure 1: Patient demographics

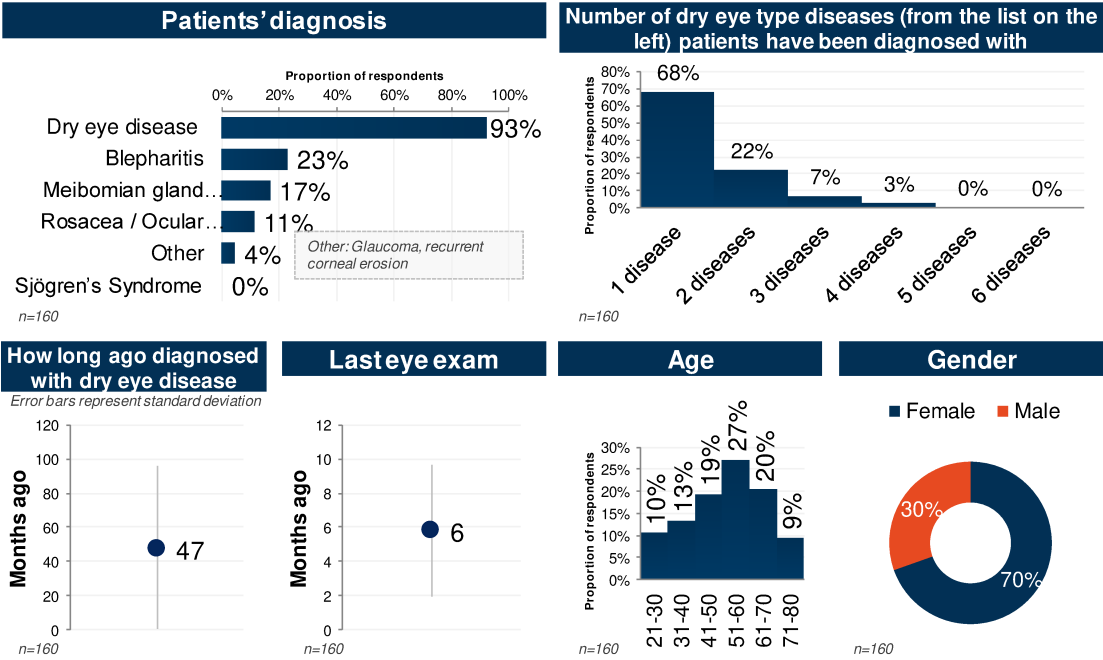

Supplementary Figure 2: Quality of life impact of dry eye disease: EQ-5D scores of respondents

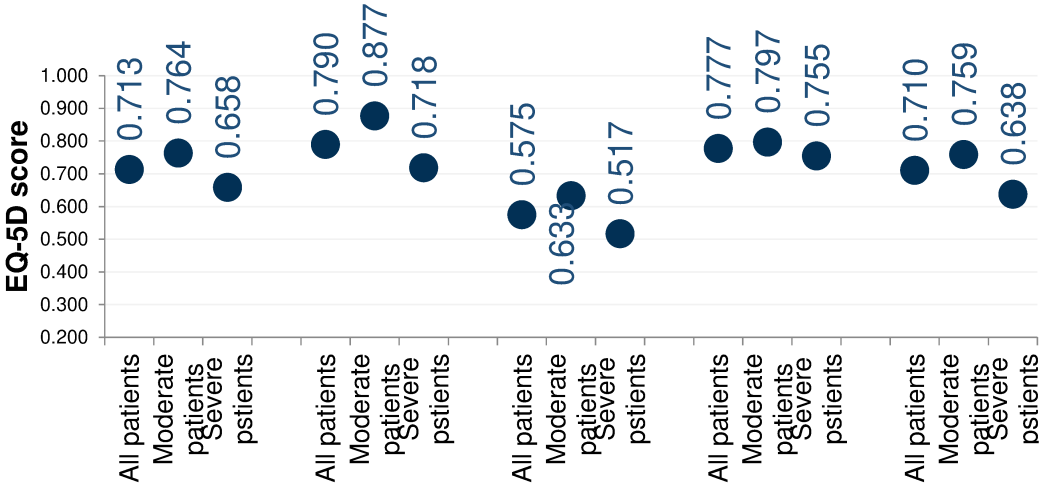

EQ-D5, European Quality of Life-5 Dimensions

October 2019

**Supplementary Table 1: Inclusion and exclusion criteria for the online survey**

| Inclusion criteria                                                                                                                                                                                                                                                                                                                                                                                                                                                                                                                                                                                     |
|--------------------------------------------------------------------------------------------------------------------------------------------------------------------------------------------------------------------------------------------------------------------------------------------------------------------------------------------------------------------------------------------------------------------------------------------------------------------------------------------------------------------------------------------------------------------------------------------------------|
| <ul style="list-style-type: none"><li>• Formal diagnosis of dry eye disease, meibomian gland dysfunction, blepharitis or rosacea</li><li>• 70% female respondents and 75% respondents aged over 40 (based on dry eye demographic)</li><li>• Score above 39 (out of 100) on the Symptoms Bother section of the IDEEL™ (Impact of Dry Eye on Everyday Life) questionnaire (i.e. moderate or severe dry eye disease)</li><li>• Examination by an ophthalmologist for their dry eye disease in the past 18 months</li><li>• Recommendation or prescription of dry eye medication by a physician.</li></ul> |
| Exclusion criteria                                                                                                                                                                                                                                                                                                                                                                                                                                                                                                                                                                                     |
| <ul style="list-style-type: none"><li>• Sjögren's syndrome.</li><li>• Age below 20 or over 80</li><li>• Frequent wearers of contact lenses</li><li>• Change in systemic medication in the past 30 days</li><li>• Patients who experienced one of the following:<ul style="list-style-type: none"><li>○ punctal occlusion procedure in the past 30 days</li><li>○ cataract surgery in the past 6 months</li><li>○ laser eye surgery for refractive errors (e.g. LASIK or PRK)</li><li>○ serious eye injury.</li></ul></li></ul>                                                                         |

October 2019

**Supplementary Table 2: Levels tested for each attribute as part of the online survey**

| <b>TREATMENT SATISFACTION</b>                                                                              |                                                                                                                                                                                                                                             |
|------------------------------------------------------------------------------------------------------------|---------------------------------------------------------------------------------------------------------------------------------------------------------------------------------------------------------------------------------------------|
| <b>Treatment effectiveness on symptoms of dry eye</b>                                                      | Treatments used completely eliminate symptoms of dry eye, Treatments used relieve most symptoms of dry eye, No reduction in dry eye symptoms                                                                                                |
| <b>Treatment experience</b>                                                                                | Treatment provides relief from itching and irritation, Treatment reduces sandy or gritty feeling in eye, Treatment provides moisturising or hydrating effect                                                                                |
| <b>How quickly the treatment starts to relieve symptoms</b>                                                | Immediately, Within 1 minute, Within 5 minutes, Within 10 minutes, Within 30 minutes, Within 1 hour, 1 hour or longer                                                                                                                       |
| <b>How long the treatment reduces symptoms for</b>                                                         | 48 hours, 24 hours, 12 hours, 6 hours, 3 hours, 2 hours, 1 hour or less                                                                                                                                                                     |
| <b>Treatment effectiveness on underlying disease (signs) of dry eye</b>                                    | Treatment repairs eye surface damage, Treatment improves tear quality, Restoring essential components of tears, Treatment reduces eye redness and inflammation, No change in underlying disease of dry eye                                  |
| <b>Time until the treatment starts helping the underlying disease and tear glands become healthy again</b> | 1 week, 2 weeks, 1 month, 3 months, 6 months                                                                                                                                                                                                |
| <b>Side effects of treatment</b>                                                                           | Blurriness upon instillation, Stinging/ burning/ discomfort upon instillation, Causes eye or eyelashes to become matted or crusty, Taste perversion, Treatment leaves residue on face, No/minimal side effects                              |
| <b>SYMPTOM BOTHER</b>                                                                                      |                                                                                                                                                                                                                                             |
| <b>Eye discomfort</b>                                                                                      | Eye dryness, Itchy eyes, Pressure build up in your eyes, Eyes that feel like they've been scratched by something, Feeling like something is in your eye, Eyes that are crusty or gooey and get stuck shut in the morning, No eye discomfort |
| <b>Eye pain</b>                                                                                            | General eye pain, Burning eyes, Stinging eyes, No eye pain                                                                                                                                                                                  |
| <b>Eye fatigue</b>                                                                                         | Tired eyes, Aching or sore eyes which make you feel like you need to close your eyes even when you're not tired, Eye strain, Eye twitching, No eye fatigue                                                                                  |

October 2019

|                                     |                                                                                                                                                                                                                                                                                                                                                                                                            |
|-------------------------------------|------------------------------------------------------------------------------------------------------------------------------------------------------------------------------------------------------------------------------------------------------------------------------------------------------------------------------------------------------------------------------------------------------------|
| <b>Eye sensitivity</b>              | Sensitivity due to light or glare, Sensitivity due to wind or re-circulated air, No eye sensitivity                                                                                                                                                                                                                                                                                                        |
| <b>Eye appearance</b>               | Red eyes, Excessive eye watering or discharge, Puffy swollen eyes or eyelids, Stringy mucus around the eye, Dark circles / bags around the eyes, Sunken eyes, Normal eye appearance                                                                                                                                                                                                                        |
| <b>Vision</b>                       | Colored spots at corners of eyes, Blurry / double vision, Diminished vision, Loss of vision, Difficulty seeing clearly at night, Perfect vision                                                                                                                                                                                                                                                            |
| <b>Blinking</b>                     | Frequent and/or rapid blinking, Difficulty blinking because of little or no moisture, Normal blinking                                                                                                                                                                                                                                                                                                      |
| <b>Other health related impacts</b> | Headaches associated with dry eye symptoms, Allergy-like symptoms, No health related impacts                                                                                                                                                                                                                                                                                                               |
| <b>TREATMENT ADMINISTRATION</b>     |                                                                                                                                                                                                                                                                                                                                                                                                            |
| <b>Frequency of treatment use</b>   | As needed, Once a day, Twice a day, Three times a day, Four times a day, Once a week, Once a month                                                                                                                                                                                                                                                                                                         |
| <b>How the medicine is applied</b>  | Drops with dropping aid (patient self-administered), Drops (patient self-administered), Ointment (patient self-administered), Spray on to eyelids (closed eyes, patient self-administered), Gel (patient self-administered), Slow release conjunctival (underneath eyelid) insert daily (patient self-administered), Slow release conjunctival (underneath eyelid) insert monthly (physician administered) |
| <b>Packaging of the treatment</b>   | Single dose pack without preservative, Multi-dose pack with preservative, Multi-dose pack without preservative                                                                                                                                                                                                                                                                                             |
| <b>How the treatment works</b>      | Artificial Tears, Steroids, Anti-inflammatories, Anti-bacterials                                                                                                                                                                                                                                                                                                                                           |
| <b>Source of medication</b>         | Prescription from doctor, Non-prescription medication                                                                                                                                                                                                                                                                                                                                                      |

October 2019

| IMPACT ON DAILY LIFE                                      |                                                                                                                                                                                                                                                                                                                                                                                                                                                                      |
|-----------------------------------------------------------|----------------------------------------------------------------------------------------------------------------------------------------------------------------------------------------------------------------------------------------------------------------------------------------------------------------------------------------------------------------------------------------------------------------------------------------------------------------------|
| <b>Impact on daily activities</b>                         | Difficulty working on a computer, Difficulty with screen-based entertainment activities, Difficulty doing close work e.g. crossword puzzles, reading, and/or sewing, Difficulty driving, Difficulty wearing makeup near or on your eyes, Difficulty flying on an airplane, Difficulty doing exercise                                                                                                                                                                 |
| <b>Impact on daily situations</b>                         | Difficulty being around and/or using scented products, Difficulty going somewhere where there is tobacco smoke, Difficulty going outdoors in windy conditions, Having to wear sunglasses, Difficulty being around animals, Difficulty getting a good night's sleep (due to my dry eye)                                                                                                                                                                               |
| <b>Emotional impact</b>                                   | Feeling irritable / impatient, Worry that your dry eyes would get worse, Feeling like there's nothing you can do for your dry eyes, Feeling like your eyes do not look nice / feeling older than you are, Feeling like people look at you and think you're fine when you're not, Feeling different from other people because of dry eyes, Feeling like you're always aware of your eyes, Feeling like you have to make adjustments to your life, No emotional impact |
| <b>Impact on work or paperwork and screen-based tasks</b> | Feeling distracted / like you can't concentrate, Having to take a break during work, Having to change the way you work, Having to change your work environment, Having to work reduced hours, Having to give up work, No impact on work                                                                                                                                                                                                                              |
| <b>Treatment inconvenience</b>                            | Difficulty planning when to use treatment, Feeling like you can't go anywhere without eye drops, Thickness of drops, Having to switch between treatments due to failure with previous product, Having to keep treatment refrigerated (between 2 – 5 °C), Having to keep yourself sterile during treatment administration, No treatment related inconveniences                                                                                                        |
